# Supplementary material for: Structural Insight into Host Recognition by Aggregative Adherence Fimbriae of Enteroaggregative Escherichia coli
Source: PubMed Central journal article supplement (PMC4169507; doi:10.1371/journal.ppat.1004404), 2014-09-18
Supplement: ppat.1004404.s012.pdf [file ppat.1004404.s012.pdf]

**Table S1**

| <b>Summary of structural constraints and structure statistics</b> |                     |
|-------------------------------------------------------------------|---------------------|
| <b>Experimental restraints</b>                                    |                     |
| Distance restraints                                               | 2721                |
| Intra-residue ( $ i-j  = 0$ )                                     | 686                 |
| Sequential ( $ i-j  = 1$ )                                        | 415                 |
| Medium-range ( $2 \leq  i-j  \leq 5$ )                            | 135                 |
| Long-range ( $ i-j  > 5$ )                                        | 682                 |
| Ambiguous                                                         | 803                 |
| <i>Total</i>                                                      |                     |
| Dihedral angle restraints ( $\phi/\psi$ )                         | 124                 |
| <b>Restraints statistics<sup>†</sup></b>                          |                     |
| RMS of distance violations (Å)                                    | $0.1363 \pm 0.0293$ |
| RMS of dihedral violations (°)                                    | $4.6516 \pm 0.7490$ |
| <b>Structural quality<sup>†</sup></b>                             |                     |
| <i>Ramachandran statistics<sup>¶</sup></i>                        |                     |
| Most favoured regions (%)                                         | 89                  |
| Allowed regions (%)                                               | 8                   |
| Disallowed regions (%)                                            | 3                   |
| <b>Coordinates precision*</b>                                     |                     |
| All backbone atoms (Å)                                            | $0.32 \pm 0.1$      |
| All heavy atoms (Å)                                               | $0.67 \pm 0.008$    |

<sup>†</sup> Average values and standard deviations over the 10 lowest-energy conformers

<sup>¶</sup> Percentage of residues in the Ramachandran plot regions determined by MOLPROBITY [51]

\* Average root mean square deviation (RMSD) over the 10 lowest-energy conformers' atomic coordinates with respect to the average structure.
