# Supplementary material for: Structural Insight into Host Recognition by Aggregative Adherence Fimbriae of Enteroaggregative Escherichia coli
Source: PubMed Central journal article supplement (PMC4169507; doi:10.1371/journal.ppat.1004404), 2014-09-18
Supplement: ppat.1004404.s013.pdf [file ppat.1004404.s013.pdf]

**Table S2**

| Crystal parameters                                         | AafB                                         | AggA                                                   | AggB                                                   |
|------------------------------------------------------------|----------------------------------------------|--------------------------------------------------------|--------------------------------------------------------|
| Space group                                                | P6 <sub>1</sub> 22                           | C222 <sub>1</sub>                                      | P2 <sub>1</sub> 2 <sub>1</sub> 2                       |
| Cell dimensions                                            | <i>a</i> = <i>b</i> =81.76, <i>c</i> =222.70 | <i>a</i> =77.832,<br><i>b</i> =80.172, <i>c</i> =91.42 | <i>a</i> =130.80, <i>b</i> =163.97,<br><i>c</i> =58.63 |
| Number of molecules per asymmetric unit                    | 2                                            | 2                                                      | 8                                                      |
| <b>Data collection</b>                                     |                                              |                                                        |                                                        |
| Beamline                                                   | DLS I24                                      | BM-14                                                  | ID23-1                                                 |
| Wavelength (Å)                                             | 0.97780                                      | 0.954                                                  | 0.98034                                                |
| Resolution (Å)                                             | 43.77-3.00<br>(3.16-3.00)                    | 47.66-1.55<br>(1.63-1.55)                              | 58.63-2.40<br>(2.53-2.40)                              |
| Unique observations                                        | 9081 (768)                                   | 40475 (5758)                                           | 50214 (7238)                                           |
| <i>R</i> <sub>merge</sub>                                  | 0.111 (0.374)                                | 0.038 (0.787)                                          | 0.062 (0.565)                                          |
| <i>&lt;I&gt;/σI</i>                                        | 6.5 (2.6)                                    | 19.0 (2.1)                                             | 14.8 (2.8)                                             |
| Completeness (%)                                           | 97.0 (98.2)                                  | 97.2 (95.8)                                            | 99.9 (99.9)                                            |
| Redundancy                                                 | 2.9 (2.9)                                    | 4.2 (4.3)                                              | 5.2 (5.4)                                              |
| Overall <i>B</i> factor from Wilson plot (Å <sup>2</sup> ) | 74.4                                         | 22.9                                                   | 55.1                                                   |
| <b>Refinement</b>                                          |                                              |                                                        |                                                        |
| <i>R</i> <sub>work</sub> / <i>R</i> <sub>free</sub> (%)    | 21.8/24.6                                    | 15.6/23.2                                              | 22.8/27.2                                              |
| Number of protein residues                                 | 263                                          | 155                                                    | 142                                                    |
| Number of ligands/ions                                     | 1 sulphate ion, 1 acetate ion                | 2 glycerol molecules                                   | 0                                                      |
| rmsd stereochemistry                                       |                                              |                                                        |                                                        |
| Bond lengths (Å)                                           | 0.009                                        | 0.008                                                  | 0.009                                                  |
| Bond angles (°)                                            | 1.181                                        | 1.344                                                  | 1.352                                                  |
| Ramachandran analysis*                                     |                                              |                                                        |                                                        |
| Residues in outlier regions                                | 0                                            | 0                                                      | 0.3%                                                   |
| Residues in favoured regions                               | 95.5%                                        | 98%                                                    | 93.0%                                                  |
| Residues in allowed regions                                | 100%                                         | 100%                                                   | 99.7%                                                  |

Values for high resolution shells in parenthesis.

$R_{merge} = \sum_h \sum_i |I(h)_i - \langle I \rangle| / \sum_h \sum_i I(h)_i$ , where  $I(h)$  is the intensity of a reflection  $h$ ,  $\sum_h$  is the sum over all reflections and  $\sum_i$  is the sum over  $i$  measurements of reflection  $h$ .

$R_{work} = \sum |F_O - F_C| / \sum F_O$  where  $F_O$  and  $F_C$  are the observed and calculated structure factors respectively.  $R_{free}$  is calculated for a test set of reflections randomly excluded from refinement.

R.m.s.d. stereochemistry is the deviation from ideal values. R.m.s.d. B-factors is deviation between bonded atoms.

\*Output from Molprobit
