# Supplementary material for: Structural Insight into Host Recognition by Aggregative Adherence Fimbriae of Enteroaggregative Escherichia coli
Source: PubMed Central journal article supplement (PMC4169507; doi:10.1371/journal.ppat.1004404), 2014-09-18
Supplement: ppat.1004404.s014.pdf [file ppat.1004404.s014.pdf]

**Table S3:** Primers used in the study

| Primer name                           | Sequence (5'-3')                                                                     |
|---------------------------------------|--------------------------------------------------------------------------------------|
| <b>pBADaafDA plasmid construction</b> |                                                                                      |
| aafDA F                               | ccggaccggttaaggcagctccccgtttttgggctaacaggaggaattaaccatgtataaaatg<br>aaaatacggagaattc |
| aafA R                                | ttaaggttaaggtctcgtcgacaaaattaaagggcggcgagccgc                                        |
| <b><i>aafA</i> mutagenesis</b>        |                                                                                      |
| D14A F                                | tcactgtagtgaataattgtgctataacgataacaccggctac                                          |
| D14A R                                | gtagccggtgttatcggtatagcacaattattcactacagtga                                          |
| T18I F                                | actgtagtgaataattgtgatataacgataataccggctacaaatcgt                                     |
| T18I R                                | acgattttagccggtattatcgttatatacacaattattcactacagt                                     |
| S30A F                                | gatgtcaacggtgacagggccgcaaatatcgacctgag                                               |
| S30A R                                | ctcaggtcgatatttgcggcctgtcaacggtgacatc                                                |
| R40A F                                | gcaaatatcgacctgagtttactattgcacaaccgcaacgct                                           |
| R40A R                                | agcgttgcggtgtgcaatagtaaaactcaggtcgatatttgc                                           |
| Q43A F                                | tttactattagacaaccggcagcgtgcgctgatgctgg                                               |
| Q43A R                                | ccagcatcagcgcagcgtgccggtgtctaataagtaaa                                               |
| R44A F                                | gtttactattagacaaccgcaagcctgcgctgatgctgg                                              |
| R44A R                                | ccagcatcagcgcaggccttgcggtgtctaataagtaaaac                                            |
| E57A F                                | aataaaagcttggggggcaggcaatcacggtcaat                                                  |
| E57A R                                | attgaccgtgattgectgcccccaagcttttatt                                                   |
| K66A F                                | gaaggcaatcacggtcaattactgatagcacctcaaggaggaa                                          |
| K66A R                                | ttctccttgaggtgctatcagtaattgaccgtgattgccttc                                           |
| K66R F                                | gcaatcacggtcaattactgataagacctcaaggagga                                               |
| K66R R                                | tcctccttgaggtcttatcagtaattgaccgtgattgc                                               |
| G69A F                                | caattactgataaaacctcaagcaggaaataaatcagcaggattc                                        |
| G69A R                                | gaatcctgctgatttatttctgcttgaggtttatcagtaattg                                          |
| K72A F                                | caattactgataaaacctcaagcaggaaatgcatcagcaggattcactctg                                  |
| K72A R                                | cagagtgaatcctgctgatgcatttctccttgaggtttatcagtaattg                                    |
| K72R F                                | ttactgataaaacctcaagcaggaaatagatcagcaggattcac                                         |
| K72R R                                | gtgaatcctgctgatctatttctccttgaggtttatcagtaa                                           |
| S73A F                                | actgataaaacctcaagcaggaaataaagcagcaggattcactc                                         |
| S73A R                                | gagtgaatcctgctgctttatttctccttgaggtttatcagt                                           |
| T77A F                                | ataaatcagcaggattcgtctggcctctcctagg                                                   |
| T77A R                                | cctaggagaggccagagcgaatcctgctgatttat                                                  |
| N88A F                                | ctctcctaggttttcttacattccggctaatacaacaacattatgaatgga                                  |
| N88A R                                | tccattcataatgtttgttgattagccggaatgtaagaaaacctaggagag                                  |
| T114A F                               | attaggaatgcagggctcaattgcaccggctatgc                                                  |
| T114A R                               | gcatagccggtgcaattgagccctgcaatcctaat                                                  |
| E131A F                               | tatatgaagtagtattaaatgctgcgcttgacaaaattaaatgctgag                                     |
| E131A R                               | ctcagcatttaattgtcacaagcgcagcatttaataactacttcatata                                    |
| L132A F                               | atatgaagtagtattaaatgctgaggcttgacaaaattaaatgctgagcttg                                 |
| L132A R                               | caagctcagcatttaattgtcacagcctcagcatttaataactacttcatat                                 |

**Supplementary Table 3: continued***aggAdsA* mutagenesis

|          |                                                               |
|----------|---------------------------------------------------------------|
| K51A     | caaaagtaacgacaagtgatcaatgtattgcagccggtgcaaaggt                |
| K55A     | aatgtattaaagccggtgcagcggctctggttatggggaac                     |
| W57A     | gccggtgcaaaggtcgcgttatggggaacagg                              |
| W59A     | ggtgcaaaggtctggtagcgggaacaggtcccg                             |
| K73AK76A | ccgctaataagtgggtcctacagcatgctgcagttgcagcacaaaaatacacattgaatcc |
| K78A     | catacacattgaatccatctatagatggag                                |
| I85A     | gttgcaaaacaaaaatacacattgaatccatctgcagatggaggtgcagatt          |
| F91A     | atctatagatggaggtgcagatgctgtgaaccaaggaactgatg                  |
| K103A    | gtgaaccaaggaactgatgcaaaaattataaagcattgacaagcgggaacaa          |
| K109A    | ttataaaaaattgacaagcgggaacgcatttctgaacgcaagtgttcagtc           |
| R152A    | acaaacaactcagacaatcgccctaccggttacataaggg                      |
